# Supplementary figures and images for: Adult-born granule cells improve stimulus encoding and discrimination in the dentate gyrus
Source: eLife journal article supplement (doi:10.7554/elife.80250), 2023-08-16

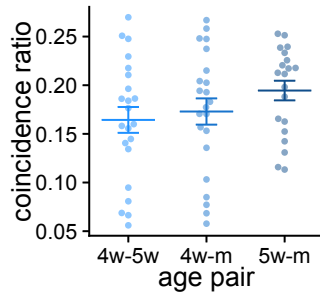

Supplement: supp [file elife-80250-supp-v1.zip]

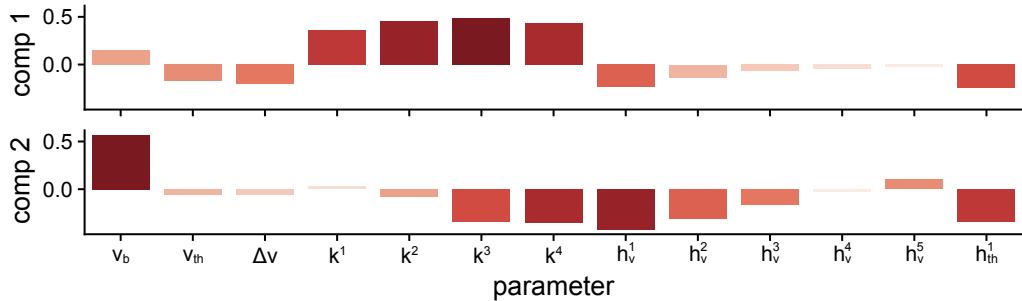

Supplement: supp [file elife-80250-supp-v1.zip]

**A**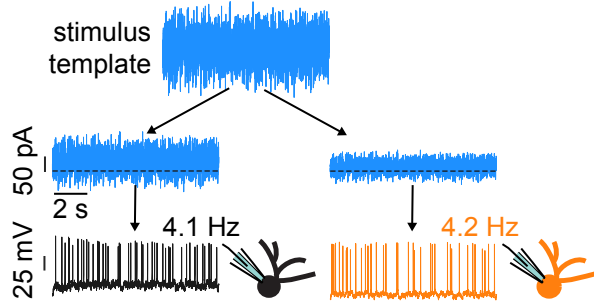**B**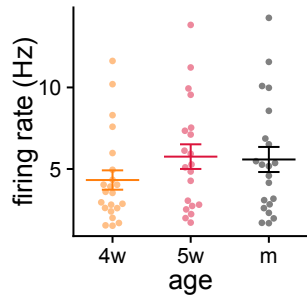**C**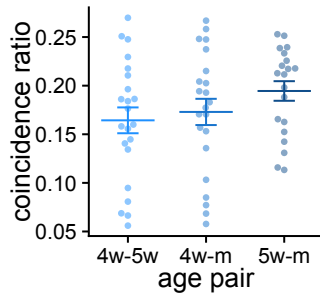**D**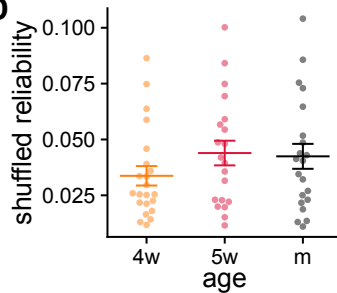

Supplement: supp [file elife-80250-supp-v1.zip]

**A**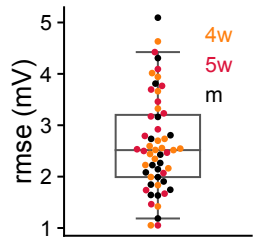**B**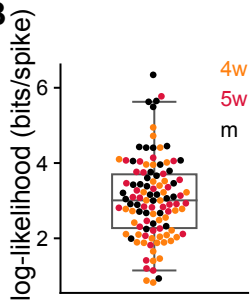**C**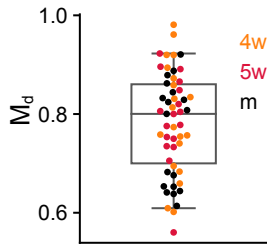**D**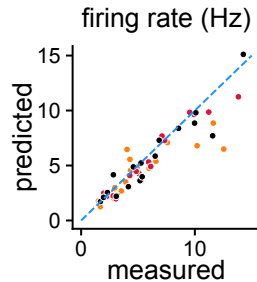**E**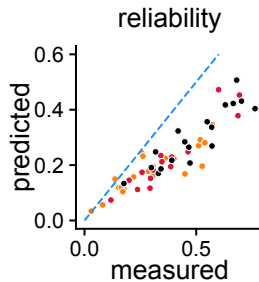**F**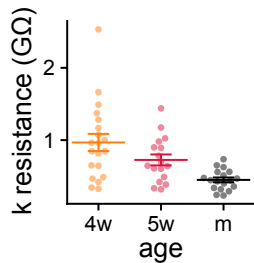**G**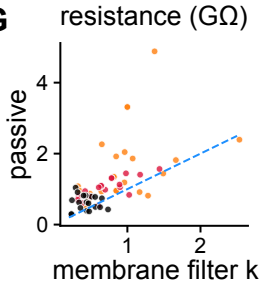**H**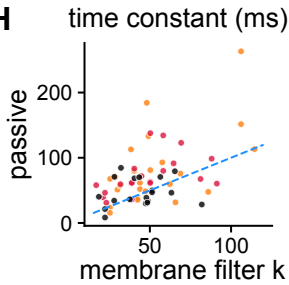

Supplement: supp [file elife-80250-supp-v1.zip]

**A**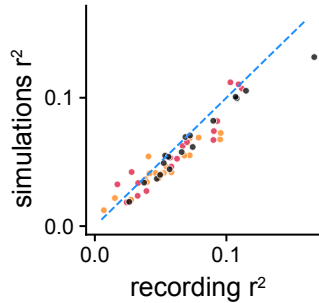**B**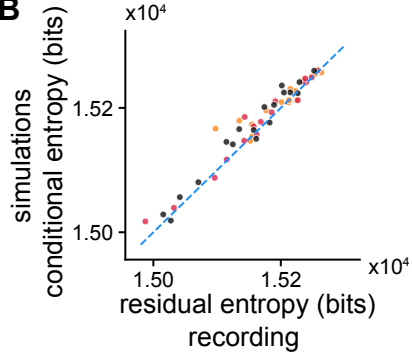

Supplement: supp [file elife-80250-supp-v1.zip]

**A**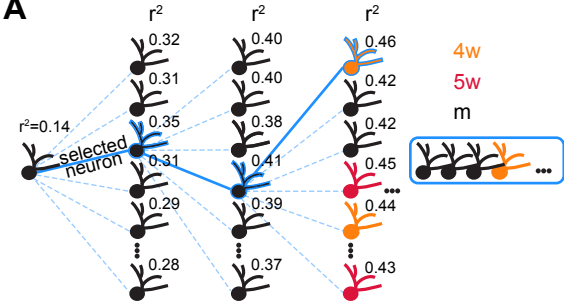**B**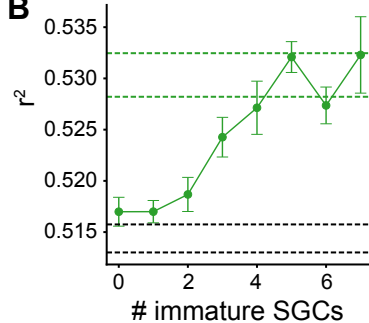**C**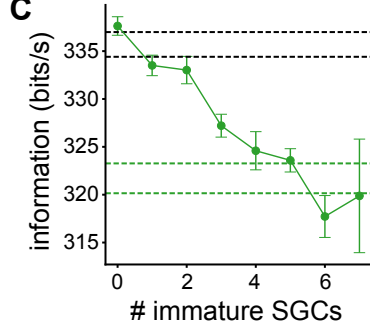

Supplement: supp [file elife-80250-supp-v1.zip]

**A**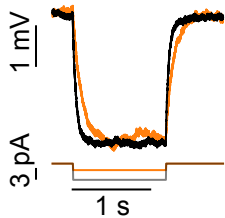**B**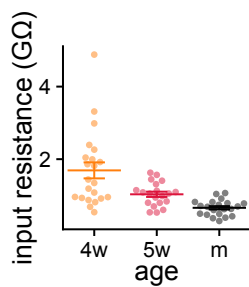**C**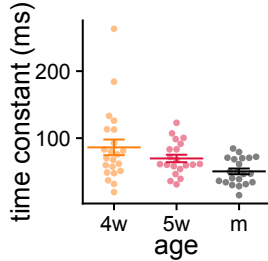**D**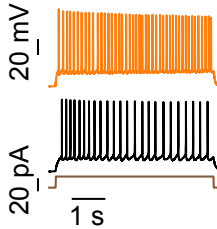**E**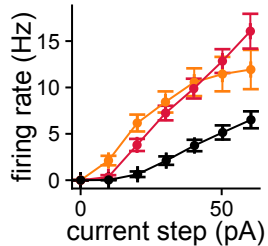

Supplement: supp [file elife-80250-supp-v1.zip]

**A**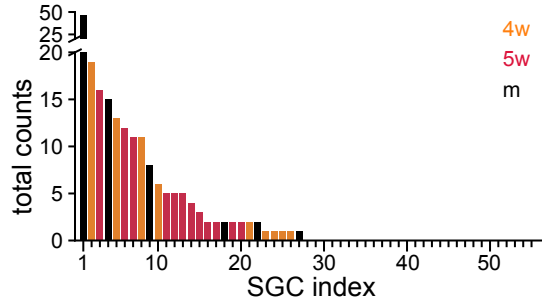**B**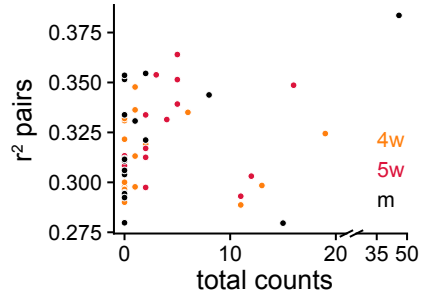

Supplement: supp [file elife-80250-supp-v1.zip]

**A**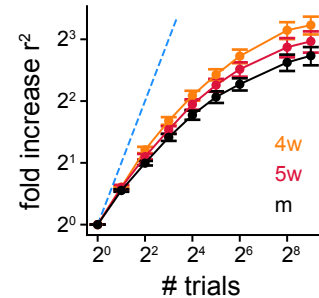**B**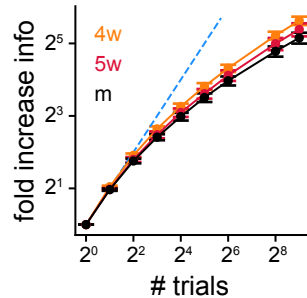**C**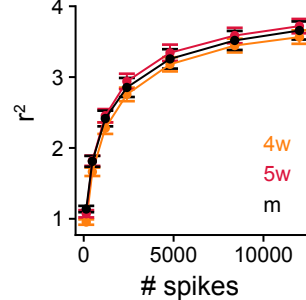**D**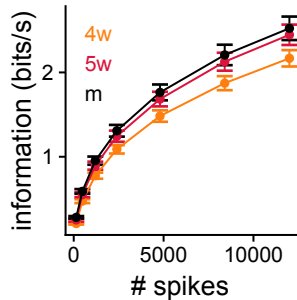

Supplement: supp [file elife-80250-supp-v1.zip]

**A**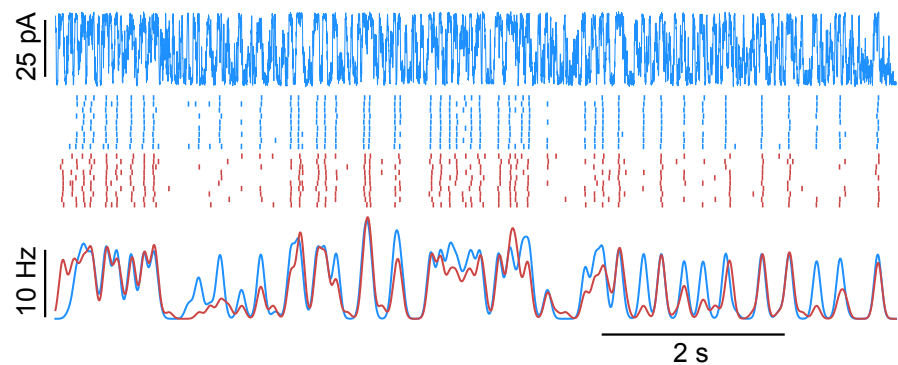**B**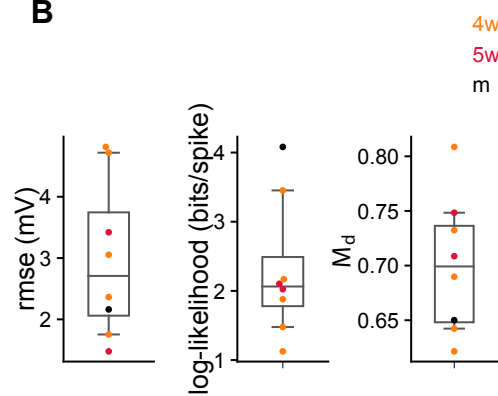**C**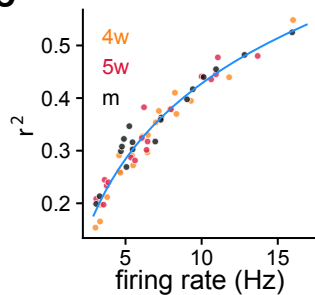**D**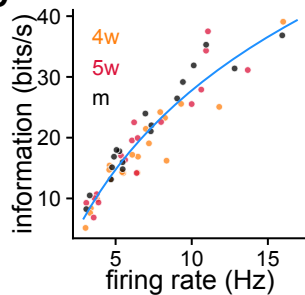**E**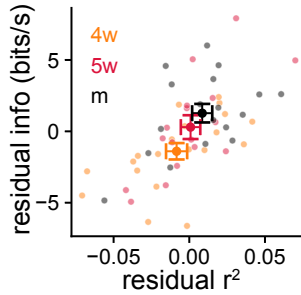**F**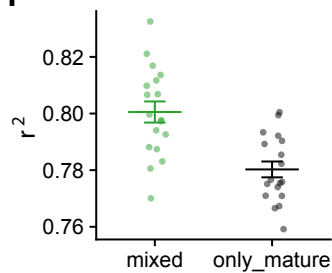**G**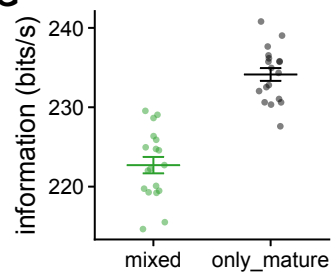

Supplement: supp [file elife-80250-supp-v1.zip]

**A**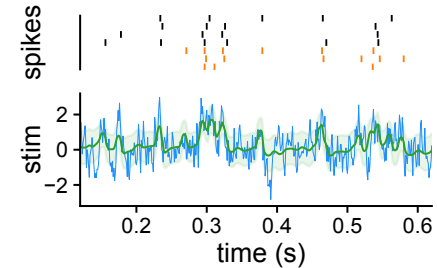**B**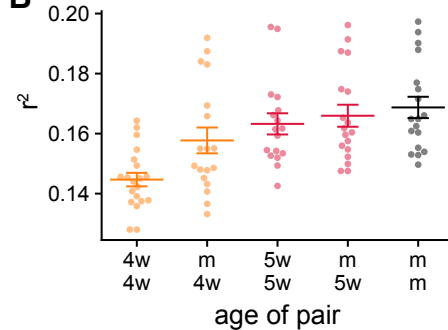**C**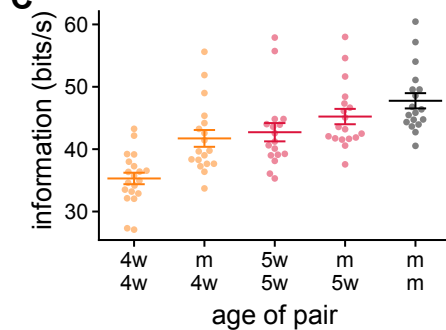

Supplement: supp [file elife-80250-supp-v1.zip]
